# Supplementary material for: Dual Role of a SAS10/C1D Family Protein in Ribosomal RNA Gene Expression and Processing Is Essential for Reproduction in Arabidopsis thaliana
Source: PubMed Central journal article supplement (PMC5085252; doi:10.1371/journal.pgen.1006408), 2016-10-28
Supplement: pgen.1006408.s013.pdf [file pgen.1006408.s013.pdf]

**S1 Table. Segregation ratio of germinated progeny of *thal-1/+*.**

| <i>thal-1/+</i> | SQ1 | SQ2 | SQ3 | SQ4 | SQ5 | SQ6 | Total | %     |
|-----------------|-----|-----|-----|-----|-----|-----|-------|-------|
| <b>HZ</b>       | 15  | 17  | 15  | 17  | 16  | 15  | 95    | 52.78 |
| <b>WT</b>       | 15  | 13  | 15  | 14  | 12  | 16  | 85    | 47.22 |
| <b>Total</b>    | 30  | 30  | 30  | 31  | 28  | 31  | 180   | 100   |

<sup>a</sup> $\chi^2$  (*P* value) = 0.46 (HZ:WT=1:1, *P* > 0.05, Student's *t* test).

<sup>b</sup>SQ: silique; HZ: heterozygote; WT: wild type.
