# Supplementary material for: Dual Role of a SAS10/C1D Family Protein in Ribosomal RNA Gene Expression and Processing Is Essential for Reproduction in Arabidopsis thaliana
Source: PubMed Central journal article supplement (PMC5085252; doi:10.1371/journal.pgen.1006408), 2016-10-28
Supplement: pgen.1006408.s015.pdf [file pgen.1006408.s015.pdf]

**S3 Table. Primers used in this study.**

| Name               | Sequence (5' to 3')                           | Purpose                                       |
|--------------------|-----------------------------------------------|-----------------------------------------------|
| SALK_016916 LP     | GAAGTGTCGACATCTGCAACC                         | Genotyping of <i>thal-1</i>                   |
| SALK_016916 RP     | CTTTTGCCTGCTCCATTAGC                          | Genotyping of <i>thal-1</i>                   |
| SALK_036872 LP     | ACAAGAGCAAAACGAAGCATG                         | Genotyping of <i>thal-2</i>                   |
| SALK_036872 RP     | CAGCTGATAAGCTCACCAAGC                         | Genotyping of <i>thal-2</i>                   |
| LBa1               | TGGTTCACGTAGTGGGCCATCG                        | Genotyping of <i>thal</i> mutants             |
| p1                 | ATGGGGAAAAAAGGAGGGACTTTG                      | RT-PCR of <i>THAL</i>                         |
| p2                 | GAAGATACAGAAGACGAAGAGGAGGC                    | RT-PCR of <i>THAL</i>                         |
| p3                 | TCTTCACTATCATCGTCTAACCAG                      | RT-PCR of <i>THAL</i>                         |
| p4                 | GAGATGATATTGGAGAACGGCGTAG                     | RT-PCR of <i>THAL</i>                         |
| p5                 | CTACATTCGGATGCTCCGGCTTG                       | RT-PCR of <i>THAL</i>                         |
| THAL cDNA-F (SalI) | ACGCAGTCGACCATGGGGAAAAAAGGAGGGACTTTG          | Protoplast transient expression construct     |
| THAL cDNA-R (SalI) | ACGCAGTCGACCATTCCGGATGCTCCGGCTTG              | Protoplast transient expression construct     |
| THALΔC-R0 (SalI)   | ACGCAGTCGACGGGAAGCTCTTCATCAAGTTCTT            | Protoplast transient expression construct     |
| THALΔC-R1 (SalI)   | ACGCAGTCGACTTCTGGCGATGACGGCATCA               | Protoplast transient expression construct     |
| THALΔC-R2 (SalI)   | ACGCAGTCGACTCTGACCTGTCCTTTGCGTCTAG            | Protoplast transient expression construct     |
| THALΔN-F (SalI)    | ACGCAGTCGACCATGGGGGATCAAAGAAGTTGATGA<br>AGAGC | Protoplast transient expression construct     |
| FIB2 CDS-F (SalI)  | ACGCAGTCGACCATGAGACCTCCTCTAACTGGAAG           | Protoplast transient expression construct     |
| FIB2 CDS-R (SalI)  | ACGCAGTCGACCTAAGCAGCAGTAGCAGCCT               | Protoplast transient expression construct     |
| THAL full-F (XmaI) | CCCCCGGGCTTTCTTCTCTGCCTCTGTTCGATTTCTTC        | <i>THAL</i> complementation construct         |
| THAL full-R (PstI) | A <u>ACTGCAG</u> CTAAGCCTGGCAGCCGATC          | <i>THAL</i> complementation construct         |
| THAL gene-R (PstI) | A <u>ACTGCAG</u> CATTCCGGATGCTCCGGCTTG        | <i>THAL</i> complementation construct         |
| THALcDNA-R(XmaI)   | CCCCCGGGCATTCCGGATGCTCCGGCTTG                 | <i>THAL</i> complementation construct         |
| 35S-F (XmaI)       | CCCCCGGGCAGTGCCTCGCTACCTTAG                   | <i>THAL</i> complementation construct         |
| GFP-F (PstI)       | A <u>ACTGCAG</u> ATGGTGAGCAAGGGCGAGG          | <i>THAL</i> complementation construct         |
| THAL out-R         | AGGGCCAAGGGAGTTGGTGTGT                        | Genotyping for <i>THAL</i> complementation    |
| THAL pro-R (XmaI)  | CCCCCGGGTGTGTGTTGCAGAGCAGGTTCTG               | GUS analysis of <i>THAL</i> promoter activity |
| rDNA 5'ETS-F       | CCTTGCTCGCATTGGTGAAT                          | qRT-PCR for rRNA processing analysis          |
| rDNA 5'ETS-R       | CGTCGACAACCTTTCCGCAT                          | qRT-PCR for rRNA processing analysis          |
| rDNA 18S-F         | TGACGGAGAATTAGGGTTC                           | qRT-PCR for rRNA processing analysis          |
| rDNA 18S-R         | CCTCCAATGGATCCTCGTTA                          | qRT-PCR for rRNA processing analysis          |
| rDNA ITS1-F        | CGCGAACCAAGATCACCA                            | qRT-PCR for rRNA processing analysis          |
| rDNA ITS1-R        | GGCAAGGAATCGGCTAAGAAA                         | qRT-PCR for rRNA processing analysis          |
| rDNA 5.8S-F        | GCAACGGATATCTCGGCTCTC                         | qRT-PCR for rRNA processing analysis          |
| rDNA 5.8S-R        | TGCGTTCAAAGACTCGATGG                          | qRT-PCR for rRNA processing analysis          |
| rDNA 25S-F         | CTACCGTGCCTGGATTATGA                          | qRT-PCR for rRNA processing analysis          |
| rDNA 25S-R         | GCTTCTAGCCGGATTCTGACT                         | qRT-PCR for rRNA processing analysis          |
| rDNA P-F           | CCGCCTAGGCTGTCCCGAAG                          | qRT-PCR for P site cleavage analysis          |
| rDNA P-R           | CGGACGAATCCAAGCCAAAG                          | qRT-PCR for P site cleavage analysis          |
| rDNA P1-F          | CTTTGGCTTGGATTCTGCCG                          | qRT-PCR for P1 site cleavage analysis         |
| rDNA P1-R          | CGTGAATTAAGTGAAGGA                            | qRT-PCR for P1 site cleavage analysis         |
| rDNA P'-F          | GTTGTGACGGTGACTCGAAGT                         | qRT-PCR for P' site cleavage analysis         |
| rDNA P'-R          | GGTCTTGACCGTCATCTTTTGC                        | qRT-PCR for P' site cleavage analysis         |

|                 |                           |                                       |
|-----------------|---------------------------|---------------------------------------|
| rDNA A2-F       | TGAACCTGCGGAAGGATCAT      | qRT-PCR for A2 site cleavage analysis |
| rDNA A2-R       | CGCGAACCAAAGATCACCA       | qRT-PCR for A2 site cleavage analysis |
| rDNA A3-F       | AAAACCCCAGCACGAAAAGTGT    | qRT-PCR for A3 site cleavage analysis |
| rDNA A3-R       | AATGCCAGCCGTTCTGTTTG      | qRT-PCR for A3 site cleavage analysis |
| rDNA B1-F       | ATGCTGTGCTGCGAACTGAA      | qRT-PCR for B1 site cleavage analysis |
| rDNA B1-R       | GAGATATCCGTTGCCGAGAGTC    | qRT-PCR for B1 site cleavage analysis |
| rDNA C2-F       | TAAATCCGAGCCAAGGACG       | qRT-PCR for C2 site cleavage analysis |
| rDNA C2-R       | TCTACTGCTTCCGGACAAGAGC    | qRT-PCR for C2 site cleavage analysis |
| rDNA B0-F       | AACAATCCCCAATTCTACACAAGTG | qRT-PCR for B0 site cleavage analysis |
| rDNA B0-R       | ACCTCGAGAGACGAGCTCGTGTA   | qRT-PCR for B0 site cleavage analysis |
| 45S-F           | GGGGGGTGGGTGTTGAGGGAG     | qRT-PCR for 45S pre-rRNA              |
| 45S-R           | GAAAAAGGGGGTTCACCGGAC     | qRT-PCR for 45S pre-rRNA              |
| VAR-F           | GACAGACTTGTCCAAAACGCCACC  | RT-PCR of rDNA variants               |
| VAR-R           | CTGGTCGAGGAATCCTGGACGATT  | RT-PCR of rDNA variants               |
| 5'EF-1 $\alpha$ | CTAAGGATGGTCAGACCCG       | Internal control                      |
| 3'EF-1 $\alpha$ | CTTCAGGTATGAAGACACC       | Internal control                      |
| ACT1-F          | CATCAGGAAGGACTTGTACGG     | Internal control                      |
| ACT1-R          | GATGGACCTGACTCGTCATAC     | Internal control                      |
| rDNA 5'ETS-F    | CCTTGCTCGCATTGGTGAAT      | qRT-PCR for rRNA processing analysis  |
| rDNA 5'ETS-R    | CGTCGACAACCTTTTCCGCAT     | qRT-PCR for rRNA processing analysis  |
| rDNA 18S-F      | TGACGGAGAATTAGGGTTC       | qRT-PCR for rRNA processing analysis  |
| rDNA 18S-R      | CCTCCAATGGATCCTCGTTA      | qRT-PCR for rRNA processing analysis  |
| rDNA ITS1-F     | CGCGAACCAAAGATCACCA       | qRT-PCR for rRNA processing analysis  |
| rDNA ITS1-R     | GGCAAGGAATCGGCTAAGAAA     | qRT-PCR for rRNA processing analysis  |
| rDNA 5.8S-F     | GCAACGGATATCTCGGCTCTC     | qRT-PCR for rRNA processing analysis  |
| rDNA 5.8S-R     | TGCGTTCAAAGACTCGATGG      | qRT-PCR for rRNA processing analysis  |
| rDNA 25S-F      | CTACCGTGCGCTGGATTATGA     | qRT-PCR for rRNA processing analysis  |
| rDNA 25S-R      | GCTTCTAGCCCGGATTCTGACT    | qRT-PCR for rRNA processing analysis  |
| rDNA P-F        | CCGCCTAGGCTGTCCCGAAG      | qRT-PCR for P site cleavage analysis  |
| rDNA P-R        | CGGACGAATCCAAGCCAAAG      | qRT-PCR for P site cleavage analysis  |
| rDNA P1-F       | CTTTGGCTTGGATTCTGTCG      | qRT-PCR for P1 site cleavage analysis |
| rDNA P1-R       | CGTGAATTAAGTGAAGGA        | qRT-PCR for P1 site cleavage analysis |
| rDNA P'-F       | GTTGTGACGGTGAAGT          | qRT-PCR for P' site cleavage analysis |
| rDNA P'-R       | GGTCTTGACCGTCATCTTTTGC    | qRT-PCR for P' site cleavage analysis |
| rDNA A2-F       | TGAACCTGCGGAAGGATCAT      | qRT-PCR for A2 site cleavage analysis |
| rDNA A2-R       | CGCGAACCAAAGATCACCA       | qRT-PCR for A2 site cleavage analysis |
| rDNA A3-F       | AAAACCCCAGCACGAAAAGTGT    | qRT-PCR for A3 site cleavage analysis |
| rDNA A3-R       | AATGCCAGCCGTTCTGTTTG      | qRT-PCR for A3 site cleavage analysis |
| rDNA B1-F       | ATGCTGTGCTGCGAACTGAA      | qRT-PCR for B1 site cleavage analysis |
| rDNA B1-R       | GAGATATCCGTTGCCGAGAGTC    | qRT-PCR for B1 site cleavage analysis |
| rDNA C2-F       | TAAATCCGAGCCAAGGACG       | qRT-PCR for C2 site cleavage analysis |
| rDNA C2-R       | TCTACTGCTTCCGGACAAGAGC    | qRT-PCR for C2 site cleavage analysis |
| rDNA B0-F       | AACAATCCCCAATTCTACACAAGTG | qRT-PCR for B0 site cleavage analysis |
| rDNA B0-R       | ACCTCGAGAGACGAGCTCGTGTA   | qRT-PCR for B0 site cleavage analysis |
| 45S-F           | GGGGGGTGGGTGTTGAGGGAG     | qRT-PCR for 45S pre-rRNA              |

|                 |                          |                          |
|-----------------|--------------------------|--------------------------|
| 45S-R           | GAAAAAGGGGGTCCACGGAC     | qRT-PCR for 45S pre-rRNA |
| VAR-F           | GACAGACTTGTCCAAAACGCCACC | RT-PCR of rDNA variants  |
| VAR-R           | CTGGTCGAGGAATCCTGGACGATT | RT-PCR of rDNA variants  |
| 5'EF-1 $\alpha$ | CTAAGGATGGTCAGACCCG      | Internal control         |
| 3'EF-1 $\alpha$ | CTTCAGGTATGAAGACACC      | Internal control         |
| ACT1-F          | CATCAGGAAGGACTTGTACGG    | Internal control         |
| ACT1-R          | GATGGACCTGACTCGTCATAC    | Internal control         |

---

<sup>a</sup>The underlined sequences denote restriction enzyme sites.
